# Supplementary material for: Genetic and pharmacological inhibition of two‐pore domain potassium channel TREK‐1 alters depression‐related behaviors and neuronal plasticity in the hippocampus in mice
Source: PubMed Central journal article supplement (PMC7816204; doi:10.1111/cns.13450), 2020-08-30
Supplement: CNS-27-220-s002.pdf [file CNS-27-220-s002.pdf]

Supplementary information for

**Genetic and pharmacological inhibition of two-pore domain potassium channel TREK-1 alters depression-related behaviors and neuronal plasticity in the hippocampus in mice**

Fangfang Wu\*, Hongbing Sun, Weigang Gong, Xiaoli Li, Zhaohui Pan, Han Shan ,  
Zhijun Zhang\*

**\*Corresponding author:**

Zhijun Zhang, MD, Ph.D., Department of Neurology, Affiliated ZhongDa Hospital, School of Medicine, Southeast University, No. 87 Dingjiaqiao Road, Nanjing, Jiangsu, China, 210009; Tel: +86 25 83262241; E-mail: janemengzhang@vip.163.com

Fangfang Wu, Ph.D., Department of Neurology, Affiliated ZhongDa Hospital, School of Medicine, Southeast University, No. 87 Dingjiaqiao Road, Nanjing, Jiangsu, China, 210009; Tel: +86 25 83262241; E-mail: fangfang.wu@seu.edu.cn

**This file includes:**

Original gel/blot images of each cropped gel/blot appearing in the manuscript

**Fig. 1A**

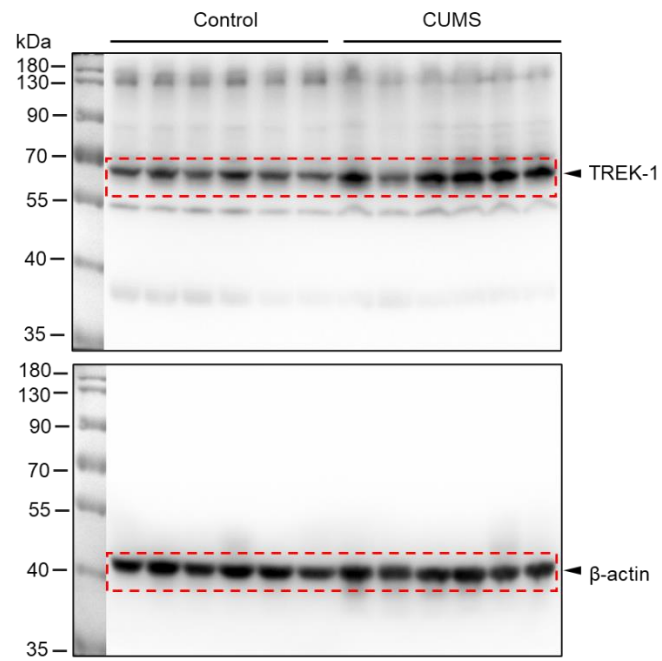

**Figure 1-1. Full unedited gel/blot for Figure 1A.**

**Fig. 1F**

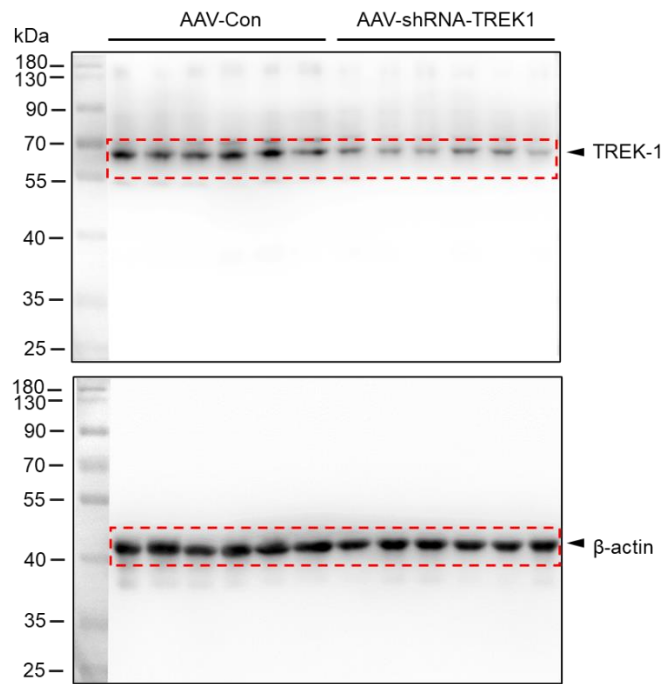

**Figure 1-2. Full unedited gel/blot for Figure 1F.**

**Fig. 2D**

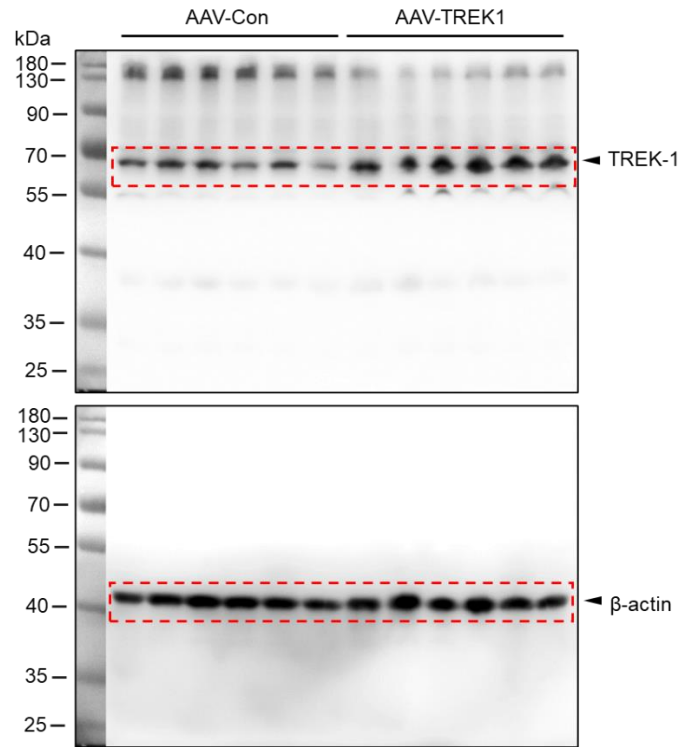

**Figure 2-1. Full unedited gel/blot for Figure 2D.**

**Fig. 3F**

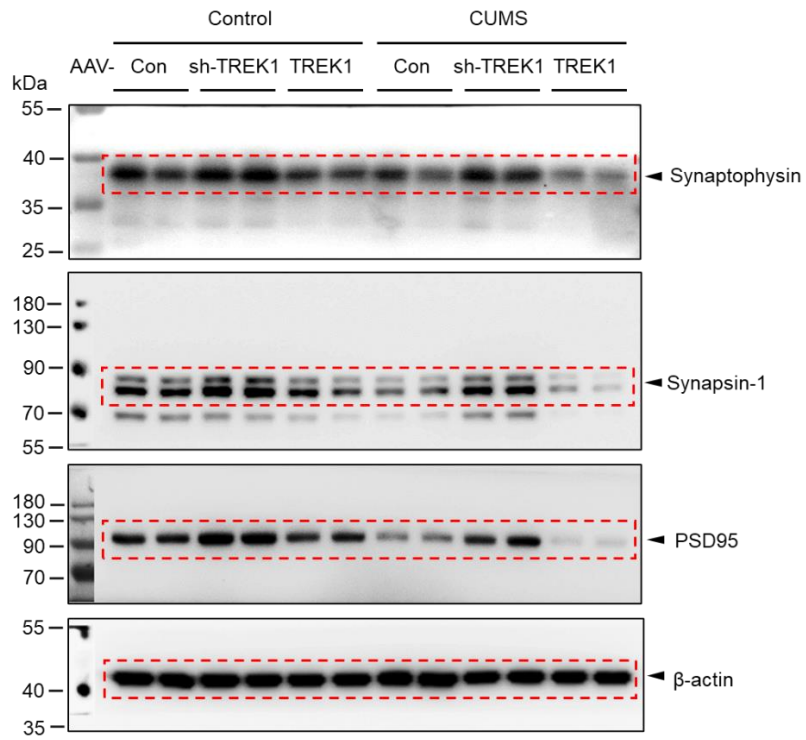

**Figure 3-1. Full unedited gel/blot for Figure 3F.**

**Fig. 5A**

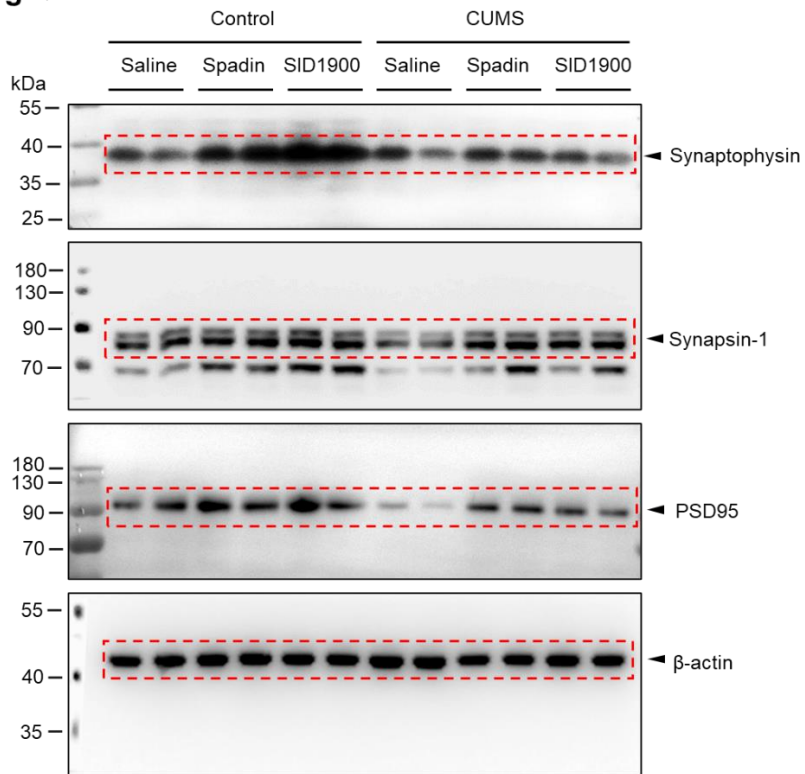

**Figure 5-1. Full unedited gel/blot for Figure 5A.**
